# Supplementary material for: Enhancing the stability of perovskite solar cells through cross-linkable and hydrogen bonding multifunctional additives
Source: Royal Society of Chemistry journal article supplement (doi:10.1039/d1ta01572a), 2021-01-01
Supplement: d1ta01572a1.pdf [file d1ta01572a1.pdf]

# **Enhancing the Stability of Perovskite Solar Cells through Cross-linkable and Hydrogen Bonding Multifunctional Additive**

Xiaodong Li <sup>1</sup>, Shanzhe Ke <sup>1</sup>, XiuXiu Feng <sup>1</sup>, Xiaoyan Zhao <sup>1</sup>, Wenxiao Zhang <sup>1</sup> and Junfeng Fang <sup>1,2\*</sup>

<sup>1</sup> School of Physics and Materials Science, Ministry of Education Nanophotonics & Advanced Instrument Engineering Research Center, East China Normal University, Shanghai 200062, China

<sup>2</sup> Ningbo Institute of Materials Technology and Engineering, Chinese Academy of Sciences, Ningbo, 315201, China

E-mail: jffang@phy.ecnu.edu.cn

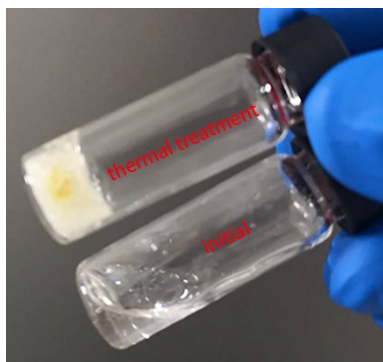

**Fig. S1.** Photographs of DPPA before and after thermal treatment.

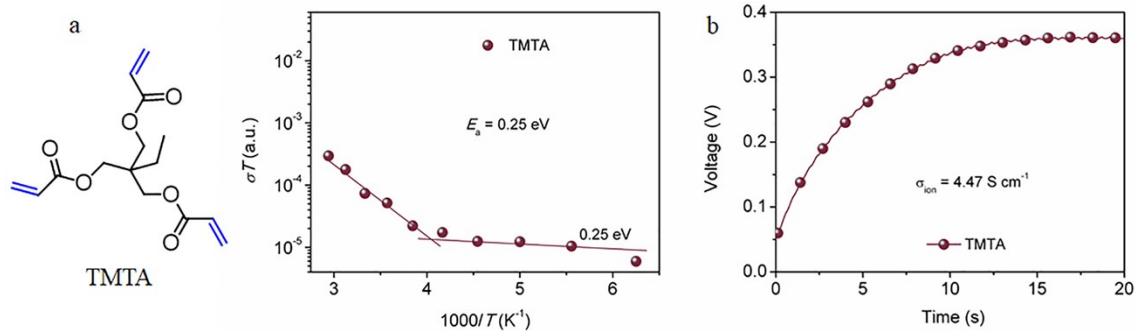

**Fig. S2.** (a) chemical structure of TMTA additive. (a) activation energy and (b) ions conductivity of perovskite films with TMTA additive. TMTA additive contains cross-linkable CH<sub>2</sub>=CH groups (blue), but doesn't contain alkoxy (-O-CH<sub>2</sub>) or hydroxyl (-OH) groups.

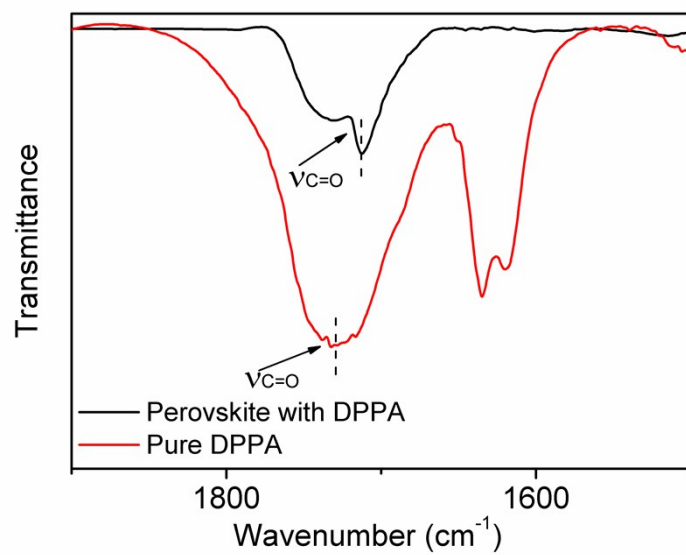

**Fig. S3.** Enlarged FTIR spectra of pure DPPA and perovskite with DPPA in C=O group region. The shift of  $\nu_{C=O}$  can be attributed to the coordination between C=O and  $PbI_2$ , which helps to passivate the defects at grain boundaries.

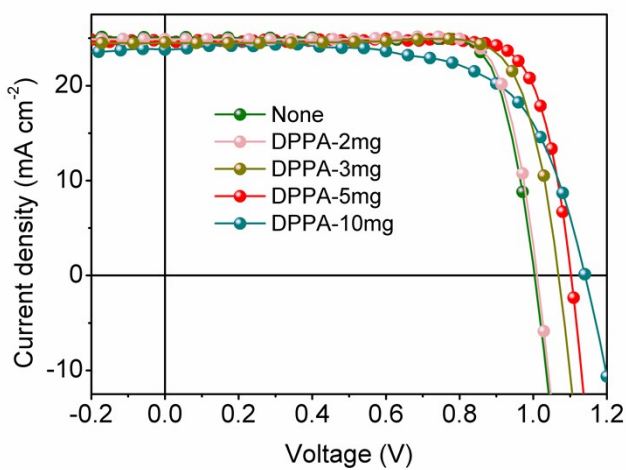

**Fig. S4.** *J-V* curves of PSCs with different concentration of DPPA.

**Table S1.** Device parameters of PSCs with different concentration of DPPA.

| DPPA concentration<br>(mg mL <sup>-1</sup> ) | $V_{oc}$<br>(V) | $J_{sc}$<br>(mA cm <sup>-2</sup> ) | FF<br>(%) | PCE<br>(%) |
|----------------------------------------------|-----------------|------------------------------------|-----------|------------|
| 0                                            | 1.00            | 25.10                              | 80.5      | 20.2       |
| 2                                            | 1.01            | 24.88                              | 81.7      | 20.5       |
| 3                                            | 1.07            | 24.49                              | 80.9      | 21.1       |
| 5                                            | 1.10            | 24.66                              | 81.0      | 22.1       |
| 10                                           | 1.16            | 23.56                              | 73.4      | 20.0       |

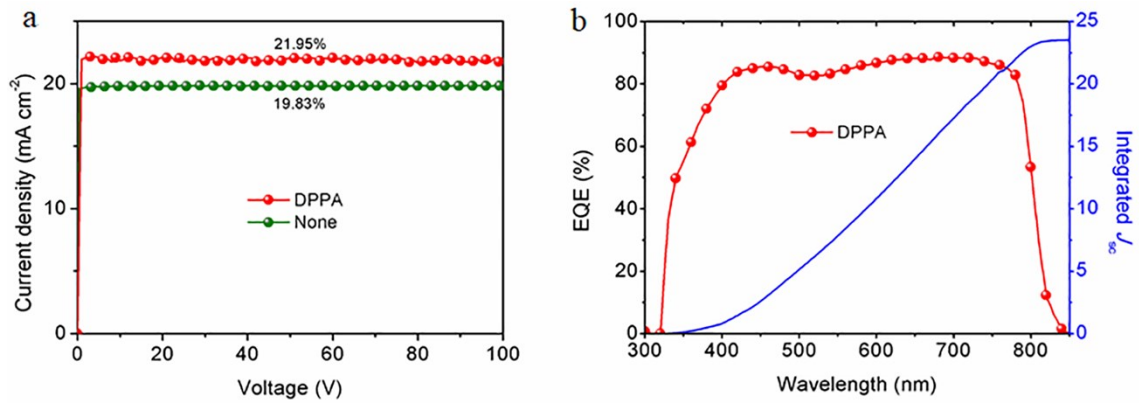

**Fig. S5.** (a) stabilized maximum power point output and (b) external quantum efficiency (EQE) of PSCs with DPPA.

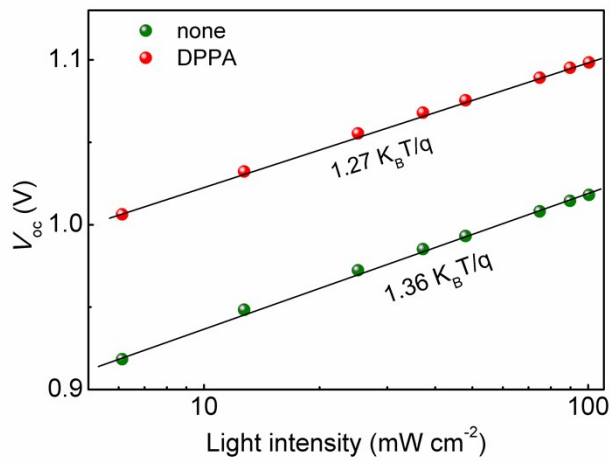

**Fig. S6.**  $V_{oc}$  dependence of PSCs on light intensity.

According to the equation  $V_{oc} = V_s + nK_B T/q \cdot \ln(P/P_s)$ , we can obtain the ideal factor ( $n$ ) of PSCs, where  $V_{oc}$  is the open-circuit voltage,  $V_s$  is the voltage under standard sun light,  $K_B$  is the Boltzmann constant,  $T$  is absolute temperature,  $q$  is the elementary charge,  $P$  is the light intensity and  $P_s$  is one standard sun intensity. Ideally, a device without trapping of charge carriers will exhibit a  $n$ -value of 1. When  $n$  approaches 2, trap-assisted recombination dominates in the device.

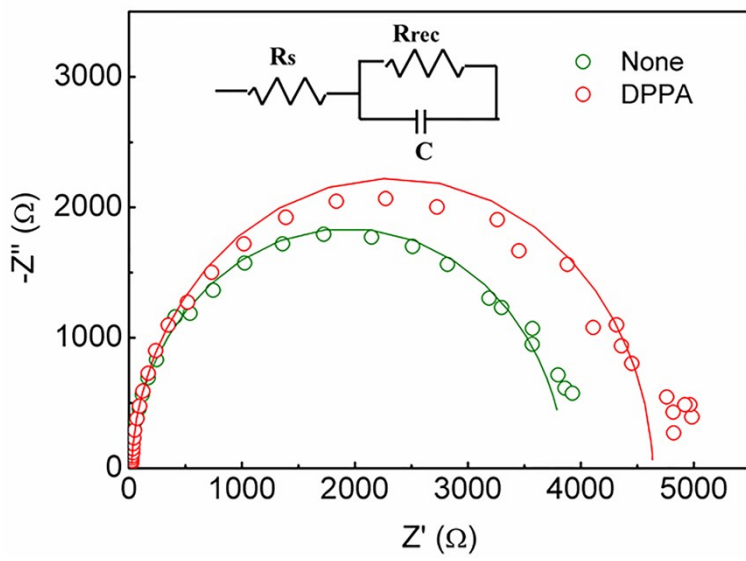

**Fig. S7.** Electrical impedance spectroscopy (EIS) of PSCs in dark. The inset shows the equivalent circuit in PSCs.



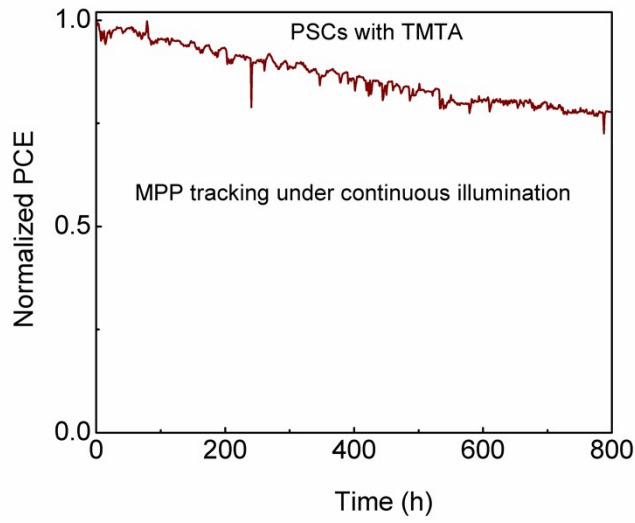

**Fig. S8.** Operational stability of PSCs with TMTA under MPP tracking conditions.

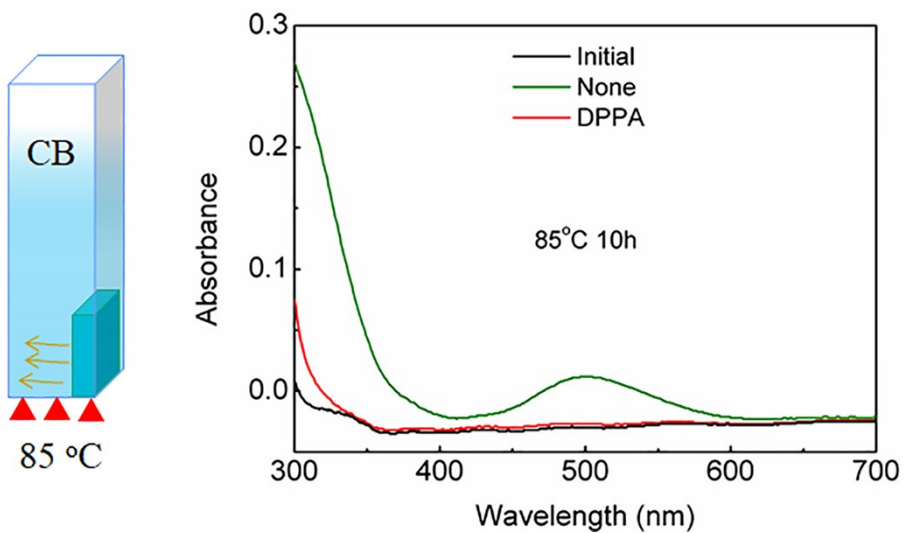

**Fig. S9.** Immersing experiment of perovskite films in chlorobenzene solvent under 85 °C conditons. In this experiment, Iodine will escape from perovskite layer due to ions diffusion and then transform into  $I_2$ , which will be captured by chlorobenzene. The curves show the absorbance of chlorobenzene 5 solvent after immersing perovskite for 10 hours.

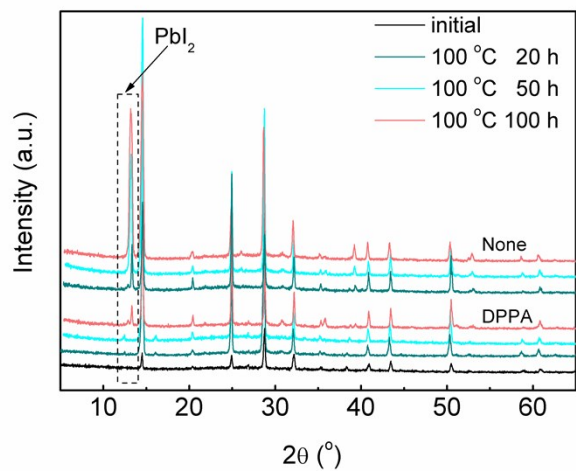

**Fig. S10.** XRD patterns of perovskite films under thermal conditions (100 °C) for different time.
